# Supplementary material
Source: PubMed Central journal article supplement (PMC7249461)
Supplement: Supp_Fig1.pdf [file Supp_Fig1.pdf]

## Supplementary Data

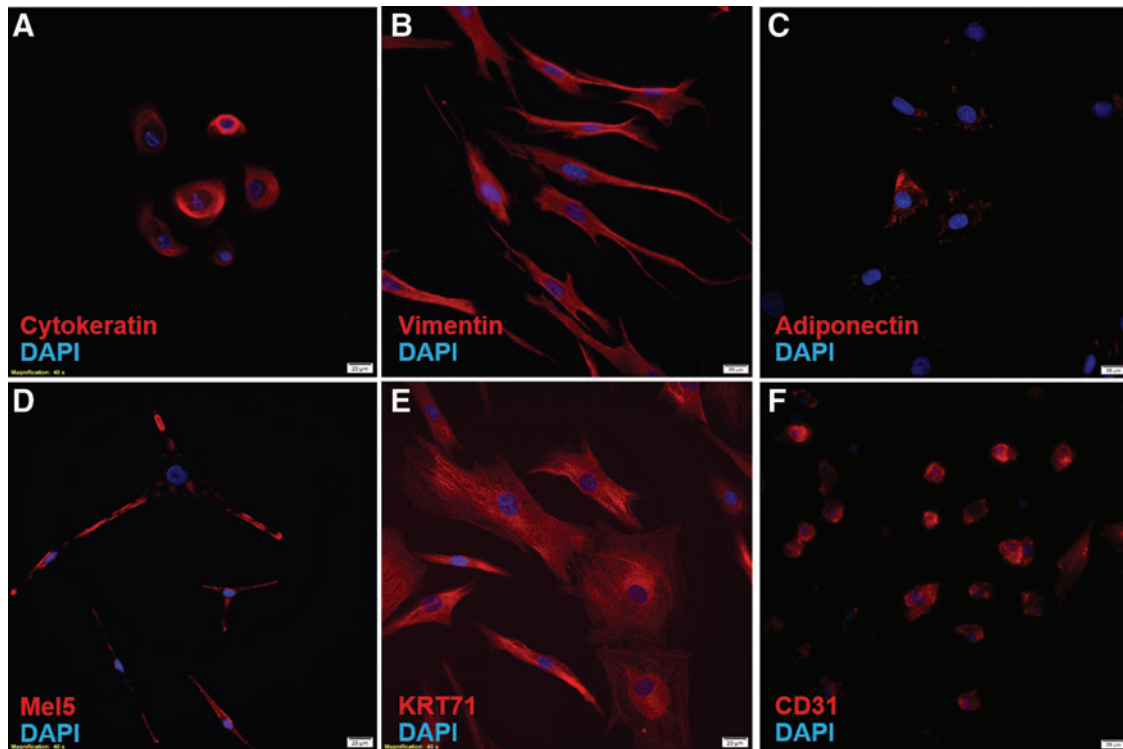

**SUPPLEMENTARY FIG. S1.** Representative immunocytochemistry image of cells before bioprinting. Immunofluorescent images of (A) keratinocytes (Pan-Cytokeratin; 40× magnification; scale bar 20  $\mu\text{m}$ ), (B) fibroblasts (Vimentin; 40× magnification; scale bar 20  $\mu\text{m}$ ), (C) adipocytes (Adiponectin; 40× magnification; scale bar 20  $\mu\text{m}$ ), (D) melanocytes (Mel5; 40× magnification; scale bar 20  $\mu\text{m}$ ), (E) follicular dermal papilla cells (KRT71; 40× magnification; scale bar 20  $\mu\text{m}$ ), and (F) human dermal microvascular endothelial cells (CD31; 40× magnification; scale bar 20  $\mu\text{m}$ ).
