# Supplementary material
Source: PubMed Central journal article supplement (PMC7249461)
Supplement: Supp_Fig2.pdf [file Supp_Fig2.pdf]

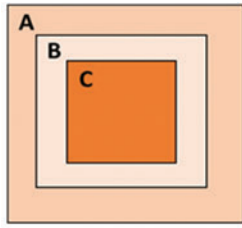

- A. Original Wound Area
- B. Contracted Wound Area
- C. Open Wound Area

$$\text{Total Wound Closure} = (A - C) / A$$

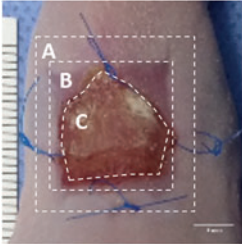

$$\text{Contraction} = (A - B) / A$$

$$\text{Epithelialization} = \text{Total Wound Closure} - \text{Contraction}$$

**SUPPLEMENTARY FIG. S2.** Wound healing digital planimetry key and equations. For digital planimetry, ImageJ was used to measure the wound areas as outline on the representative image; (A) original wound area, (B) outer healing wound border, (C) open wound border. The following equations were used to obtain the data used for the graphs in Figures 2–4. The equation, Total Wound Closure =  $(A - C)/A$ , was used to quantify the percentage of total wound closure relative to the original wound area. The equation, Contraction =  $(A - B)/A$ , was used to quantify the percentage of contraction by measuring the area inside the current outer healing wound border relative to the original wound area. The equation, Epithelialization = Total Wound Closure - Contraction.
